# Supplementary material
Source: PubMed Central journal article supplement (PMC9136713)
Supplement: NIHMS1806582-supplement-Supplemental_figures_and_text.pdf [file NIHMS1806582-supplement-Supplemental_figures_and_text.pdf]

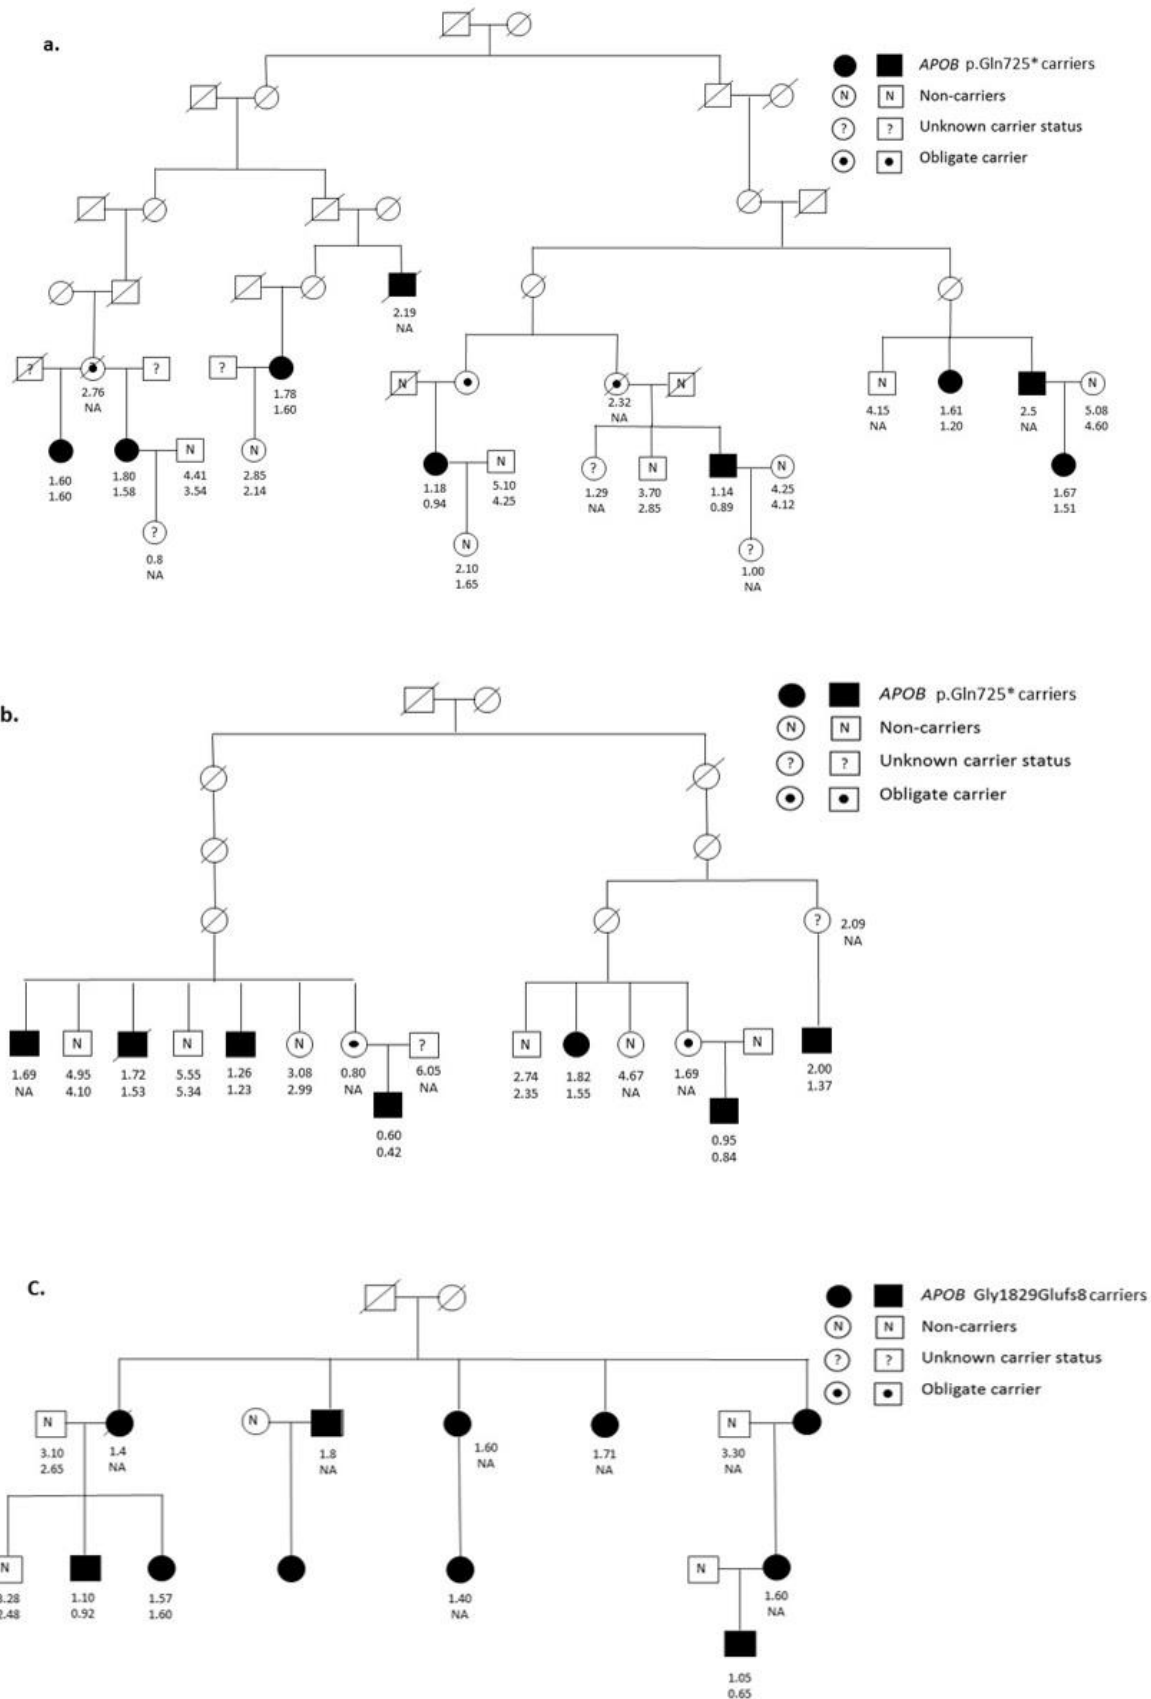

## Supplementary Figure 1

### Pedigrees of families with *APOB* p.Gln725\* mutation and *APOB* p.Gly1829Glufs8 mutation

(a,b) Pedigrees of families with *APOB* p.Gln725\* mutation. (c) Pedigree of family with *APOB* p.Gly1829Glufs8 mutation. Squares denote male family members, circles denote female family members, and symbols with slashes denote deceased family members. Values below symbols are non-HDL cholesterol (above) and LDL cholesterol (below) in mmol/L for family members with available lipid information. The pedigrees have been simplified to maintain confidentiality.

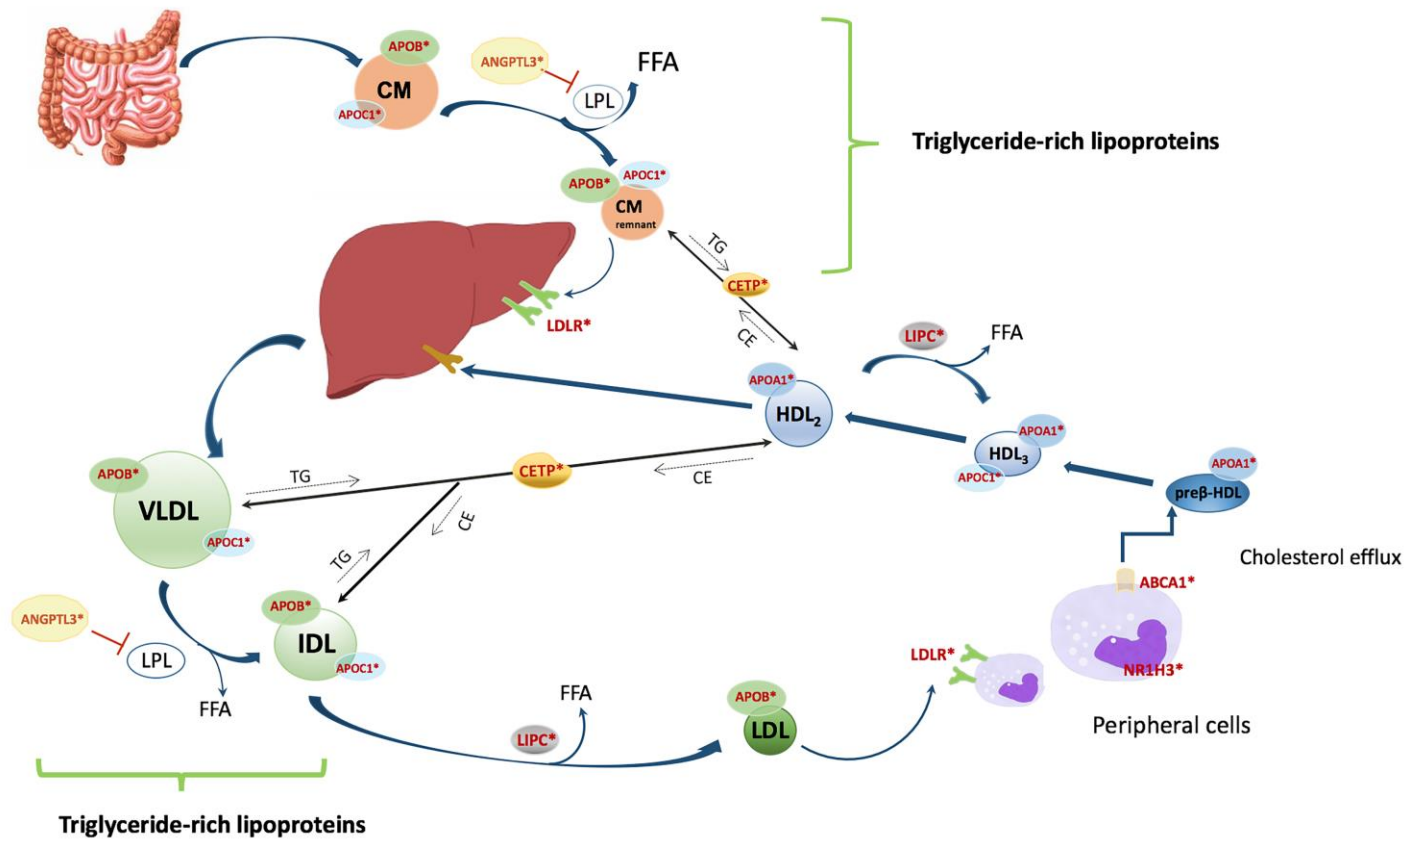

**Supplementary Figure 2**

**A schematic illustration of the lipid metabolism genes harboring mutations described in this study.**

Cholesterol and triglycerides (TG) are transferred together by triglyceride-rich lipoproteins, including very low-density lipoprotein (VLDL), intermediate-density lipoproteins (IDL), chylomicrons, and chylomicron remnants. Apolipoprotein B, encoded by *APOB*, is an essential structural component of VLDL, IDL, LDL, and chylomicrons. The *APOA1* gene encodes apolipoprotein A-I, the major protein component of HDL particles that have a key role in reverse cholesterol transport. Apolipoprotein C-I, encoded by *APOC1*, is associated with both HDL and triglyceride-rich lipoproteins, inhibits cholesteryl ester transfer protein (*CETP*), and hinders hepatic clearance of triglyceride-rich lipoproteins. ATP-binding cassette transporter (*ABCA1*) mediates the efflux of cholesterol and phospholipids to lipid-poor apolipoprotein A-1 to form nascent pre-β-HDL. Triglycerides from triglyceride-rich lipoproteins are hydrolyzed into free fatty acids by lipoprotein lipase (LPL). Angiopoietin-like 3 (encoded by the *ANGPTL3* gene) inhibits LPL. *CETP* and hepatic lipase (encoded by *LIPC*) are central in lipoprotein remodeling. *CETP* facilitates transfer of cholesteryl ester (CE) from HDL to triglyceride-rich lipoproteins in exchange for triglycerides. Hepatic lipase (*LIPC*) remodels large lipoprotein particles into smaller and denser particles. IDL is converted to LDL by the action of hepatic lipase (*LIPC*). LDL is taken up by liver and other tissues in an endocytotic process that involves the LDL receptor (*LDLR*). Liver X receptor, encoded by the *NR1H3* gene, is a cholesterol sensor that induces transcription of multiple genes that protect cells from cholesterol overload.

## Supplementary Note

The Egger regression estimate proposed by Bowden *et al.*<sup>1</sup> using the effect estimates for the allele that has a positive effect on the predictor, can be extended to include multiple covariates for performing weighted multiple regression. When we apply multiple Egger regression to the data of Do *et al.*<sup>2</sup>, the triglyceride effect, with high density lipoprotein cholesterol (HDL-C) and low density lipoprotein cholesterol (LDL-C) levels included in the analysis, is 0.15 (P=0.028), lower than the reported 0.37 (P=1.3e-9) based on residual regression (See Table). Since non-HDL-C encompasses cholesterol from triglyceride-rich lipoproteins (including very low density lipoprotein cholesterol (VLDL-C)) and has a stronger correlation with the risk of coronary artery disease (CAD) than LDL-C<sup>3</sup>, we are also interested in whether triglycerides associate with the risk of CAD after accounting for non-HDL-C instead of LDL-C levels. Although the effect estimates of Do *et al.* do not include non-HDL-C effects, these can be estimated from the LDL-C and triglyceride effects. The multiple Egger regression estimates this effect as insignificant 0.09 (P=0.33), while the linear regression estimates it as 0.22 (P=0.00011).

| Predictor | Covariates       | Residual regression effect (P) | Multiple Egger regression effect (P) |
|-----------|------------------|--------------------------------|--------------------------------------|
| LDL-C     | –                | 0.41 (9.7e-21)                 | 0.62 (1.5e-14)                       |
| LDL-C     | TG, HDL-C        | 0.39 (4.8e-23)                 | 0.56 (3.6e-15)                       |
| HDL-C     | –                | -0.18 (0.00066)                | -0.29 (0.0050)                       |
| HDL-C     | LDL-C, TG        | -0.03 (0.37)                   | -0.14 (0.11)                         |
| TG        | –                | 0.44 (1.7e-8)                  | 0.39 (1.2e-5)                        |
| TG        | LDL-C, HDL-C     | 0.37 (1.3e-9)                  | 0.15 (0.028)                         |
| TG        | Non-HDL-C, HDL-C | 0.22 (0.00011)                 | 0.09 (0.33)                          |
| Non-HDL-C | –                | 0.50 (9.6e-27)                 | 0.65 (4.9e-16)                       |
| Non-HDL-C | TG, HDL-C        | 0.42 (2.2e-21)                 | 0.56 (3.5e-12)                       |

**Table.** Mendelian randomization analysis of the relationship between lipid levels and coronary artery disease (CAD) risk. The lipid levels are for low density lipoprotein cholesterol (LDL-C), high density lipoprotein cholesterol (HDL-C), triglycerides (TG) and non-HDL cholesterol (non-HDL-C). The non-HDL-C effects were estimated based on the relationship between LDL-C and TG effects and non-HDL-C effects in Iceland.

## References

1. Bowden, J., Davey Smith, G. & Burgess, S. Mendelian randomization with invalid instruments: effect estimation and bias detection through Egger regression. *Int J Epidemiol* 44, 512-25 (2015).
2. Do, R. et al. Common variants associated with plasma triglycerides and risk for coronary artery disease. *Nat Genet* 45, 1345-52 (2013).
3. Varbo, A. et al. Remnant cholesterol as a causal risk factor for ischemic heart disease. *J Am Coll Cardiol* 61, 427-36 (2013).
